# Supplementary material for: Targeting CXCR4 impaired T regulatory function through PTEN in renal cancer patients
Source: PubMed Central journal article supplement (PMC11183124; doi:10.1038/s41416-024-02702-x), 2024-05-04

A

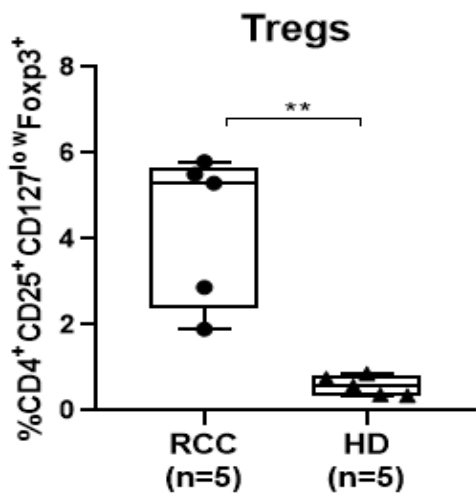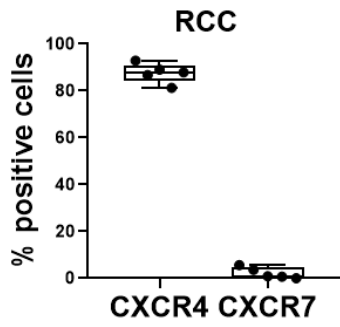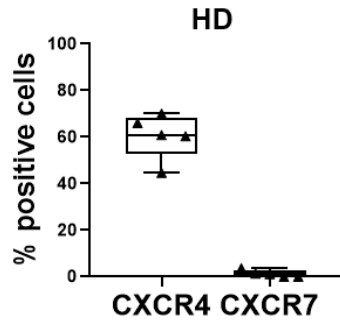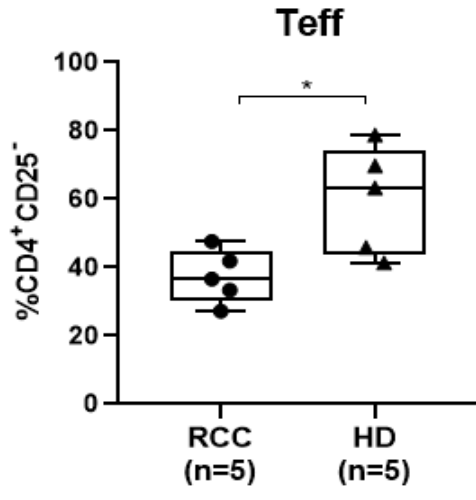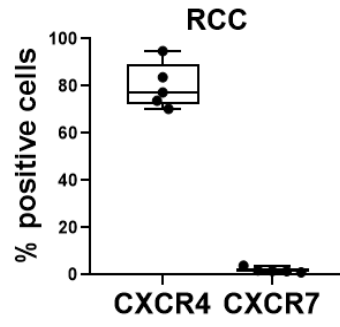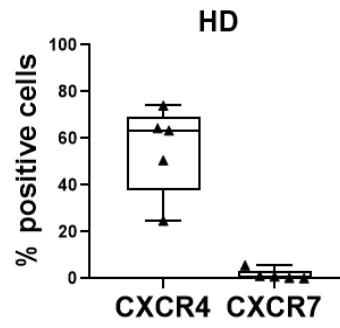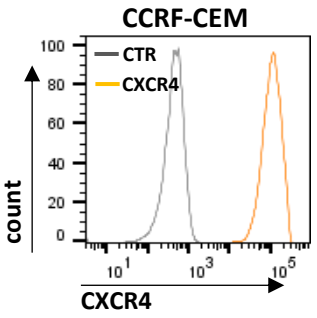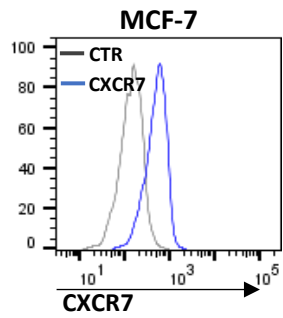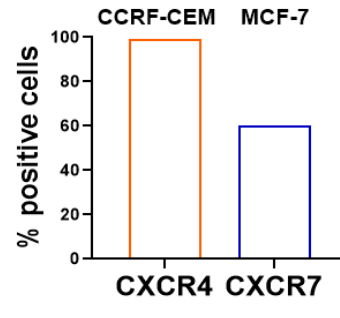

# Supplementary Figure S1

**B**

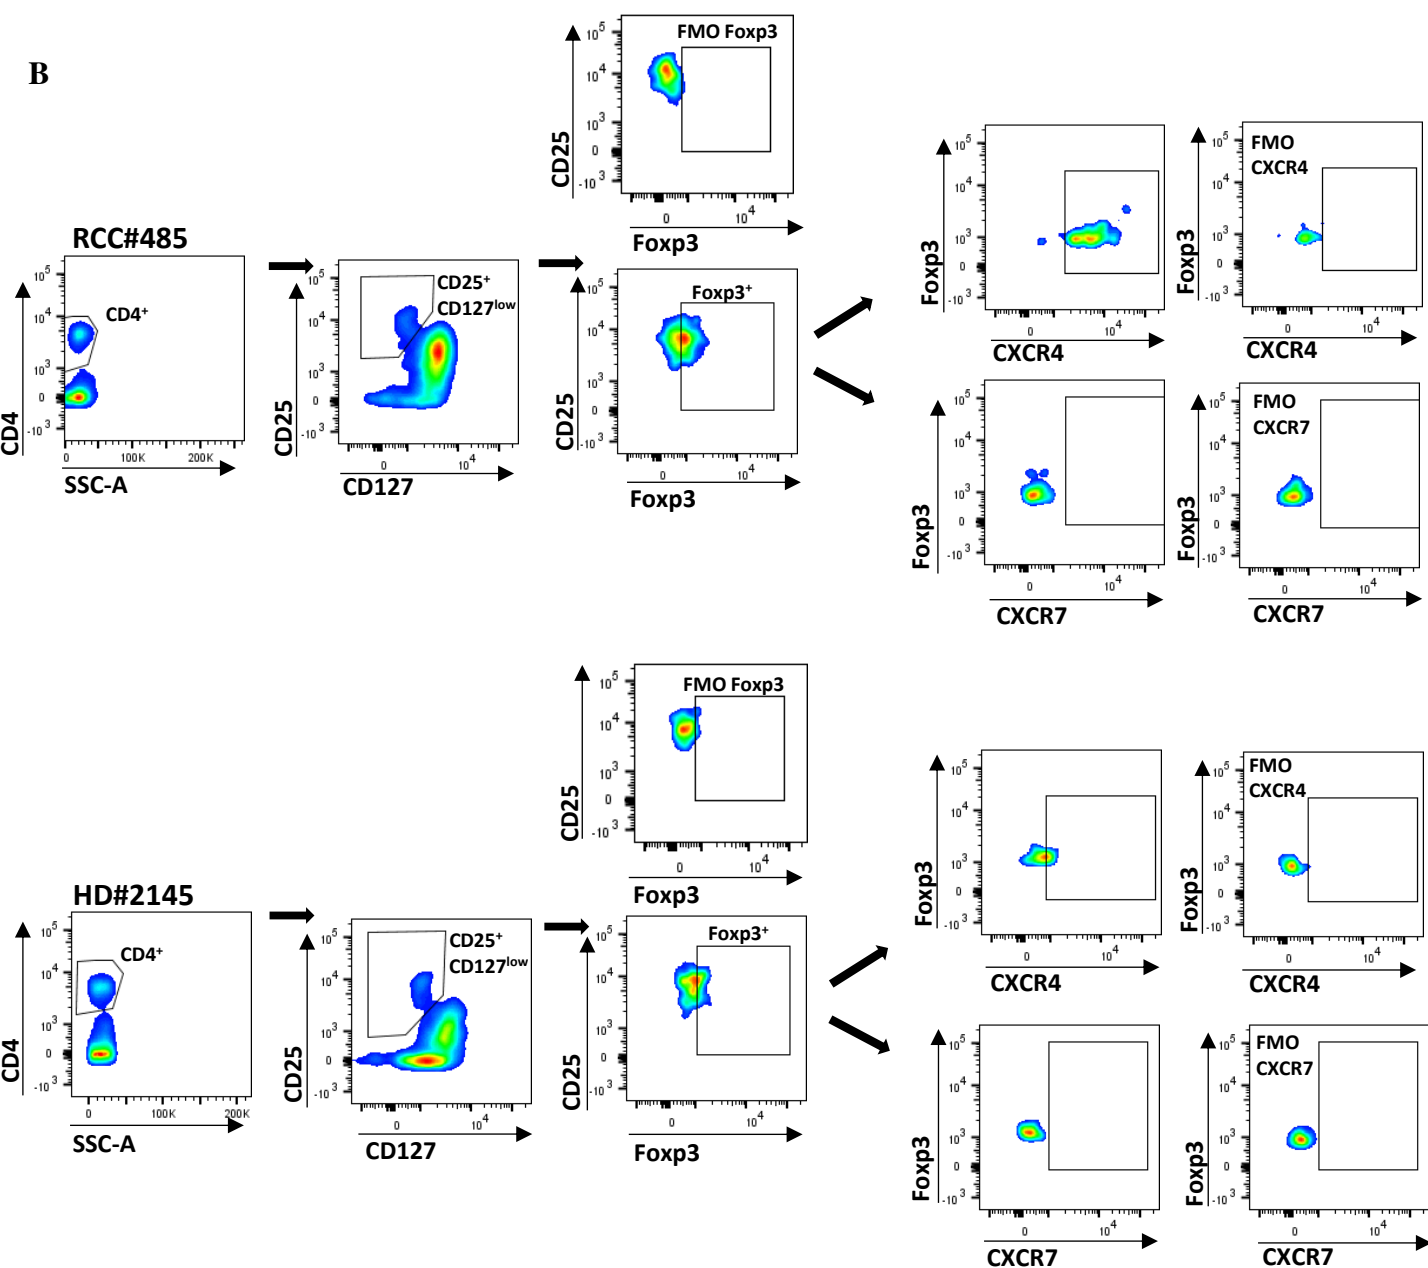

**C**

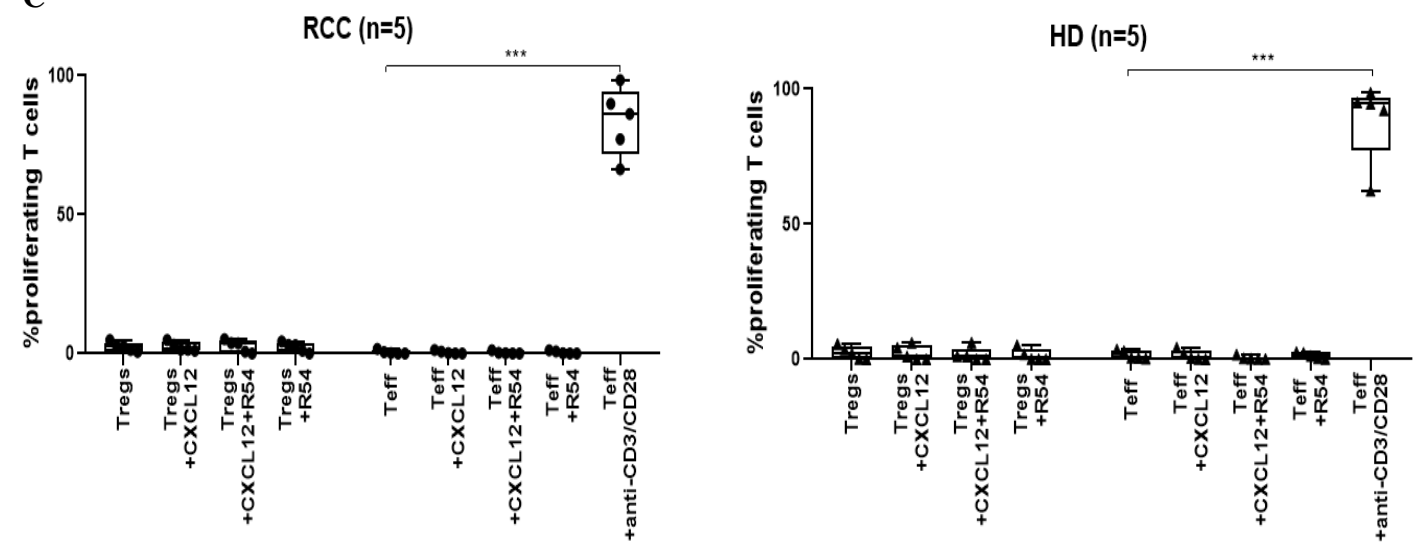

Supplementary Figure S2

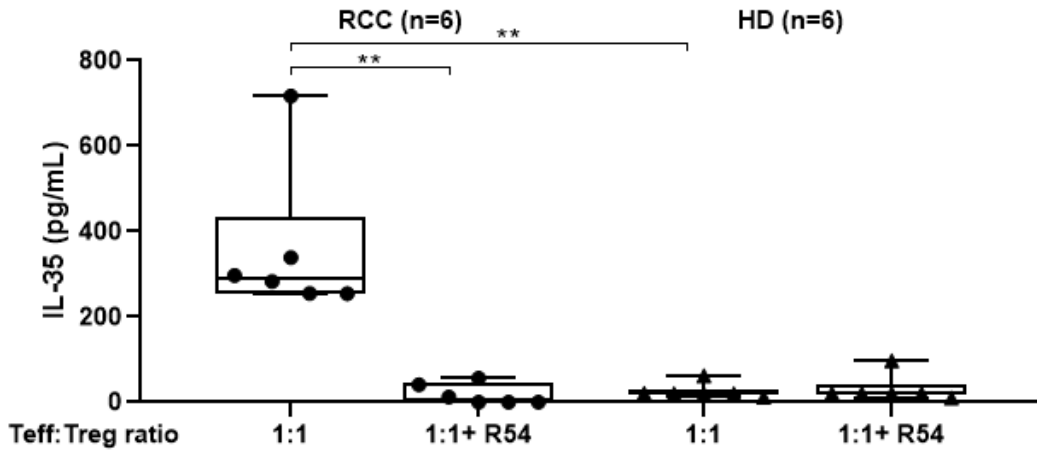

Supplementary Figure S3

A

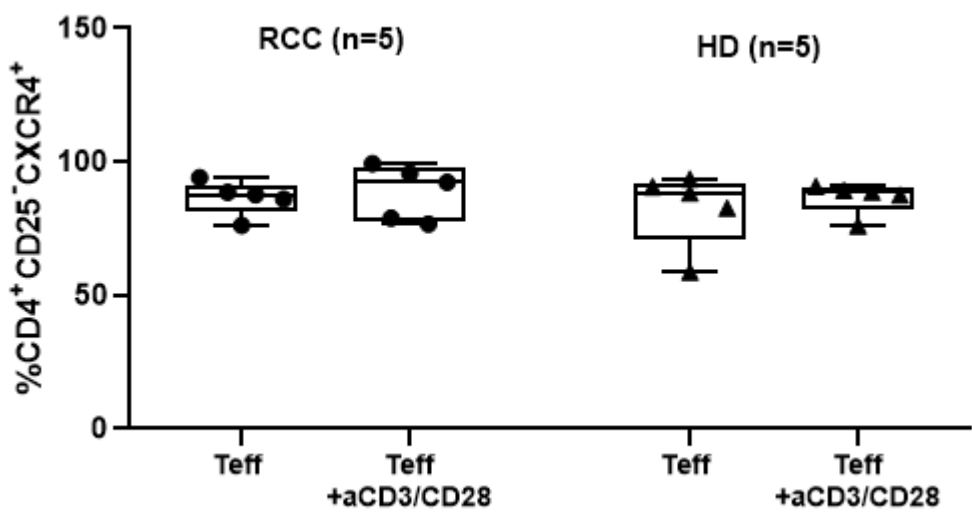

B

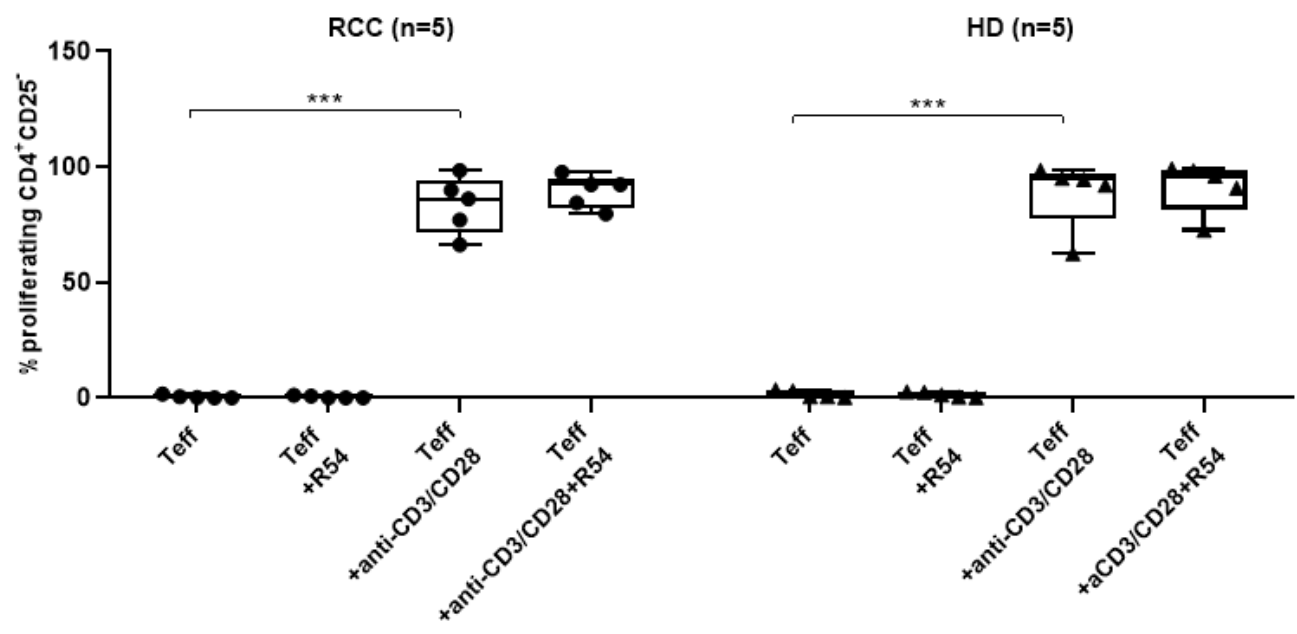

# Supplementary Figure S4

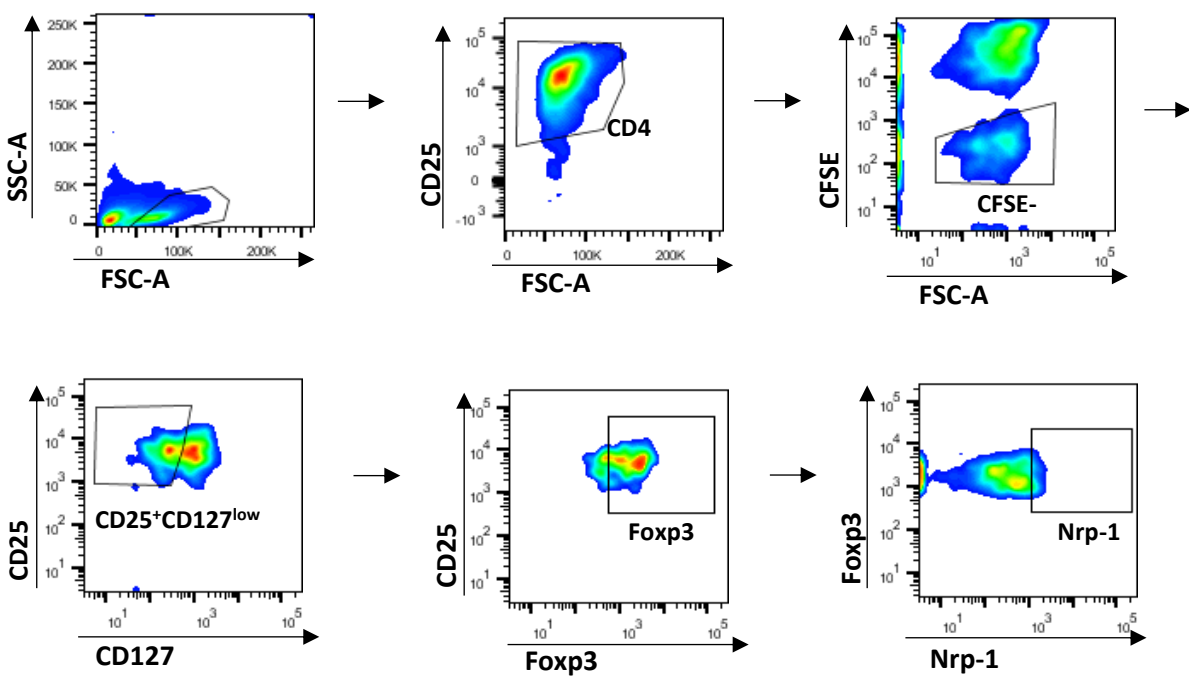

Supplementary Figure S5

A

% CD25<sup>+</sup>PTEN<sup>+</sup> in CD4<sup>+</sup>Foxp3<sup>+</sup> cells

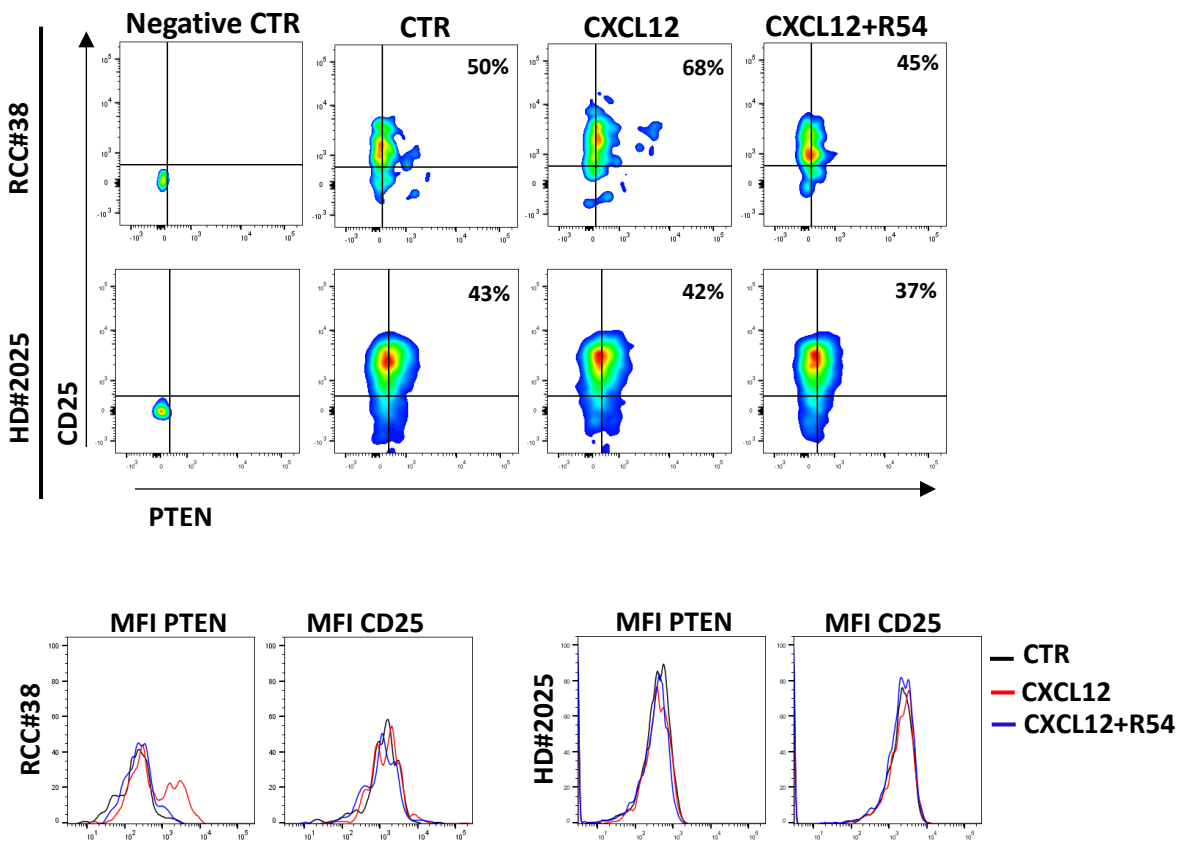

B

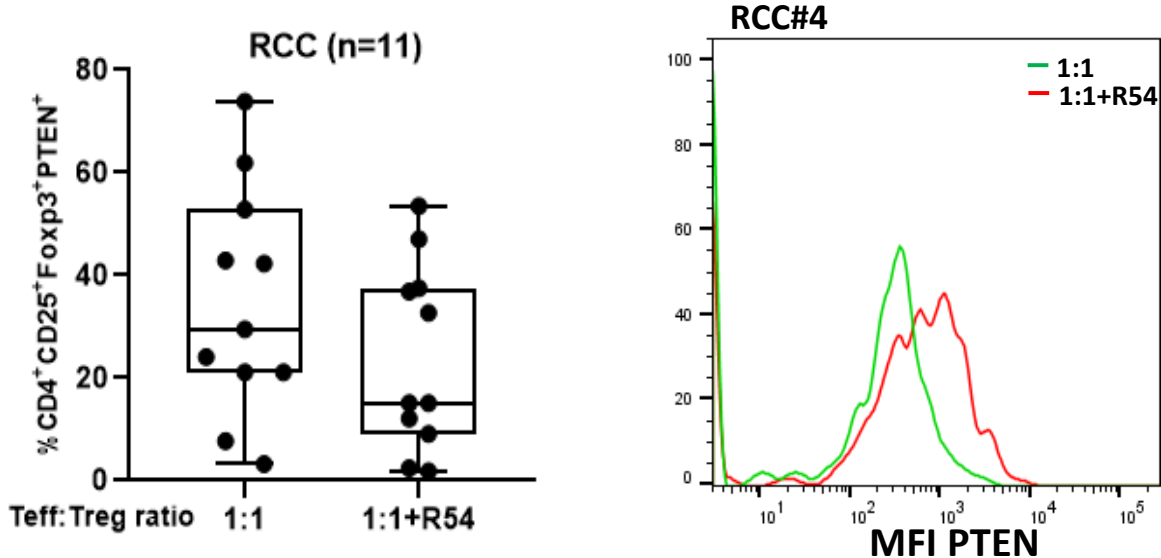

Supplementary Figure S6

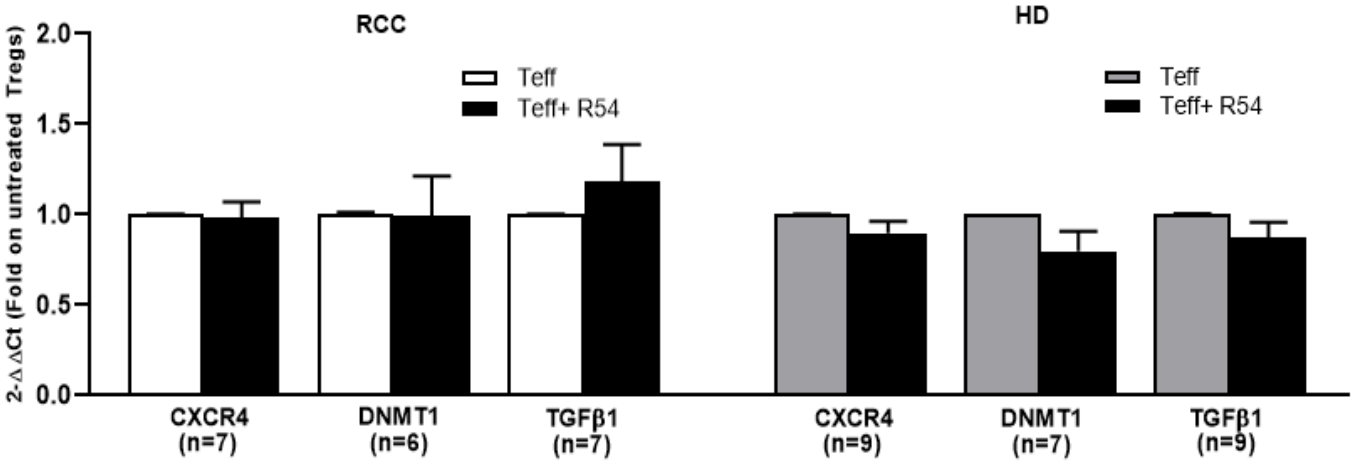

Supplement: 41416_2024_2702_MOESM1_ESM.pdf [file 41416_2024_2702_MOESM1_ESM.pdf]
